# Supplementary material for: Psoriasiform Inflammation Is Associated with Mitochondrial Fission/GDAP1L1 Signaling in Macrophages
Source: MDPI journal article supplement (doi:10.3390/ijms221910410), 2021-09-27
Supplement: s1 [file s1]

**Supplementary Table 1. shRNA target sequences used in this study**

| Clone ID       | NM ID     | Symbol     | Target Sequence       |
|----------------|-----------|------------|-----------------------|
| TRCN0000072246 | N/A       | LUCIFERASE | CAAATCACAGAATCGTCGTAT |
| TRCN0000138924 | NM_024034 | GDAP1L1    | GCAGACATTTAGCCAATGCCA |
| TRCN0000414034 | NM_024034 | GDAP1L1    | ACGCTTTGCCTTCCGGAAAGT |

**Supplementary Table 2. Primer sequences used for qPCR in this study**

| Primer Name | Species | Forword primer sequence (5'-3') | Reverse primer sequence (5'-3') |
|-------------|---------|---------------------------------|---------------------------------|
| IL-6        | Mouse   | TCCAGTTGCCTTCTTGGGAC            | GTGTAATTAAGCCTCCGACTTG          |
| IL-17A      | Mouse   | GCTCCAGAAGGCCCTCAG              | CTTTCCTCCGCATTGAC               |
| IL-23p19    | Mouse   | CCCGTATCCAGTGTGAAGATG           | CCCTTTGAAGATGTCAGAGTCA          |
| IL-24       | Mouse   | AGAACCAGCCACCTTCACACA           | CCCAAATCGGAACTCTTGACC           |
| TNF         | Mouse   | CCCTCACACTCAGATCATCTTCT         | GCTACGACGTGGGCTACAG             |
| GAPDH       | Mouse   | AGCTTGTCATCAACGGGAAG            | TTTGATGTTAGTGGGGTCTCG           |

**Supplementary Table 3. Primer sequences used for qPCR in this study**

| Primer Name | Species | Forword primer sequence (5'-3') | Reverse primer sequence (5'-3') |
|-------------|---------|---------------------------------|---------------------------------|
| IL-6        | Human   | AGCGCCTTCGGTCCAGTTGC            | GTGGCTGTCTGTGTGGGGCG            |
| IL-23p19    | Human   | TCCAAGCCTCAGTCCCAG              | TGGGGTGGTAGATTTATCTTGG          |
| IL-24       | Human   | CAGGAGGAACACGAGACTGA            | GCACAACCATCTGCATTTGAGA          |
| TNF         | Human   | ATGAGCACTGAAAGCATGATCC          | GAGGGCTGATTAGAGAGAGGGTC         |
| GAPDH       | Human   | TGCACCACCAACTGCTTAGC            | GGCATGGACTGTGGTCATGAG           |
| GDAP1L1     | Human   | CTCTGAATGGGGCTGGATAA            | ACCCAACACATGGACCAAAT            |

**a**

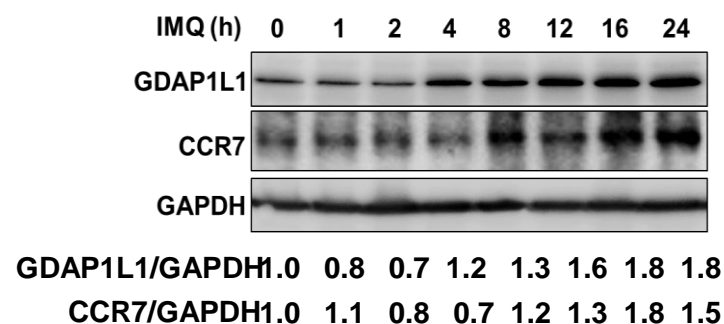

**b**

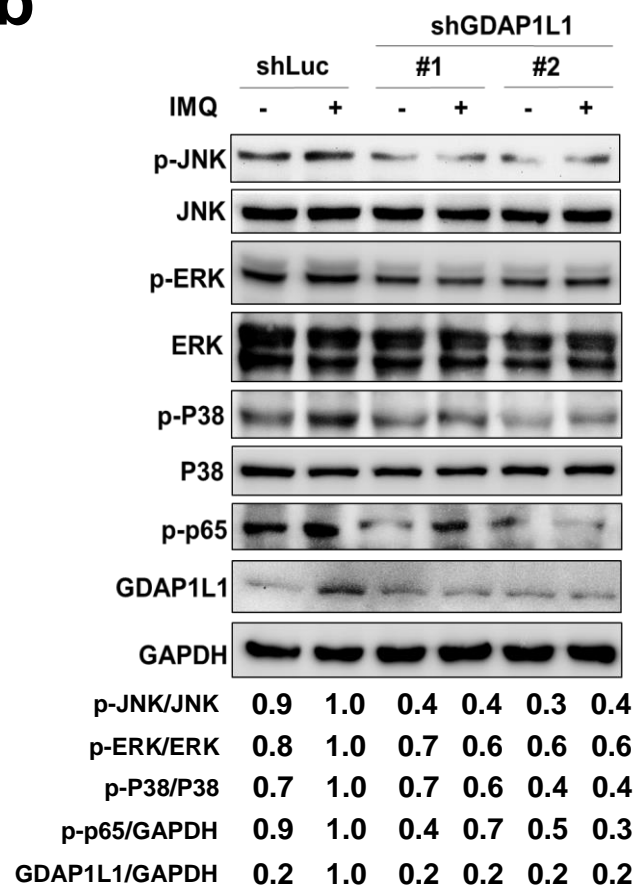

**c**

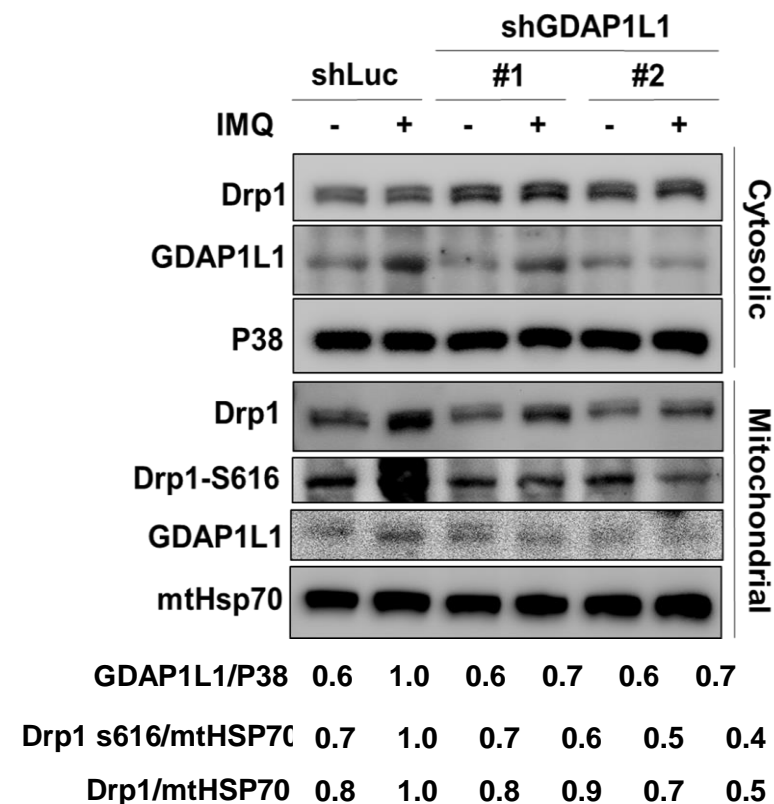

**a**

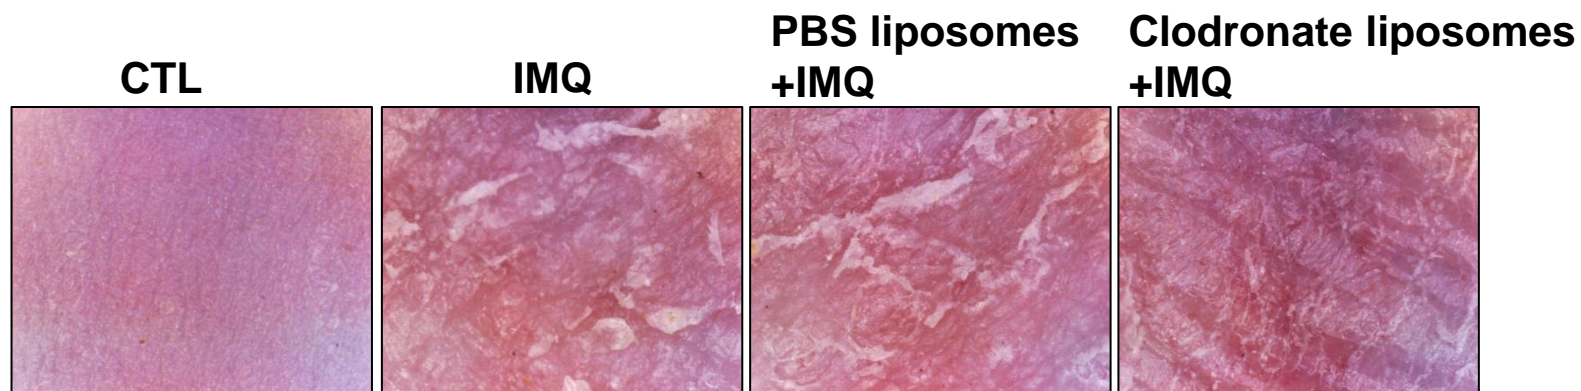

**b**

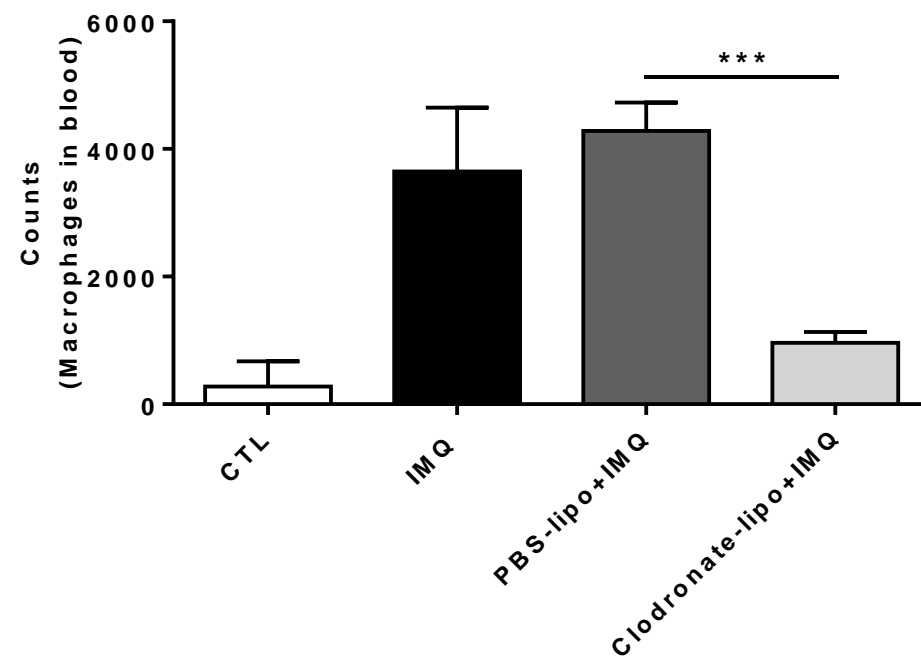

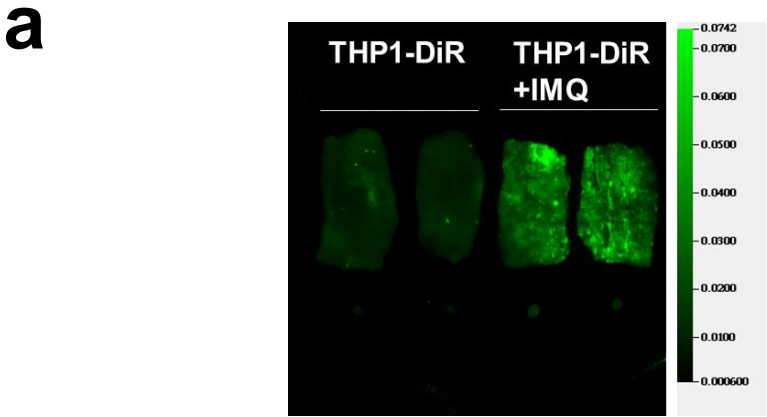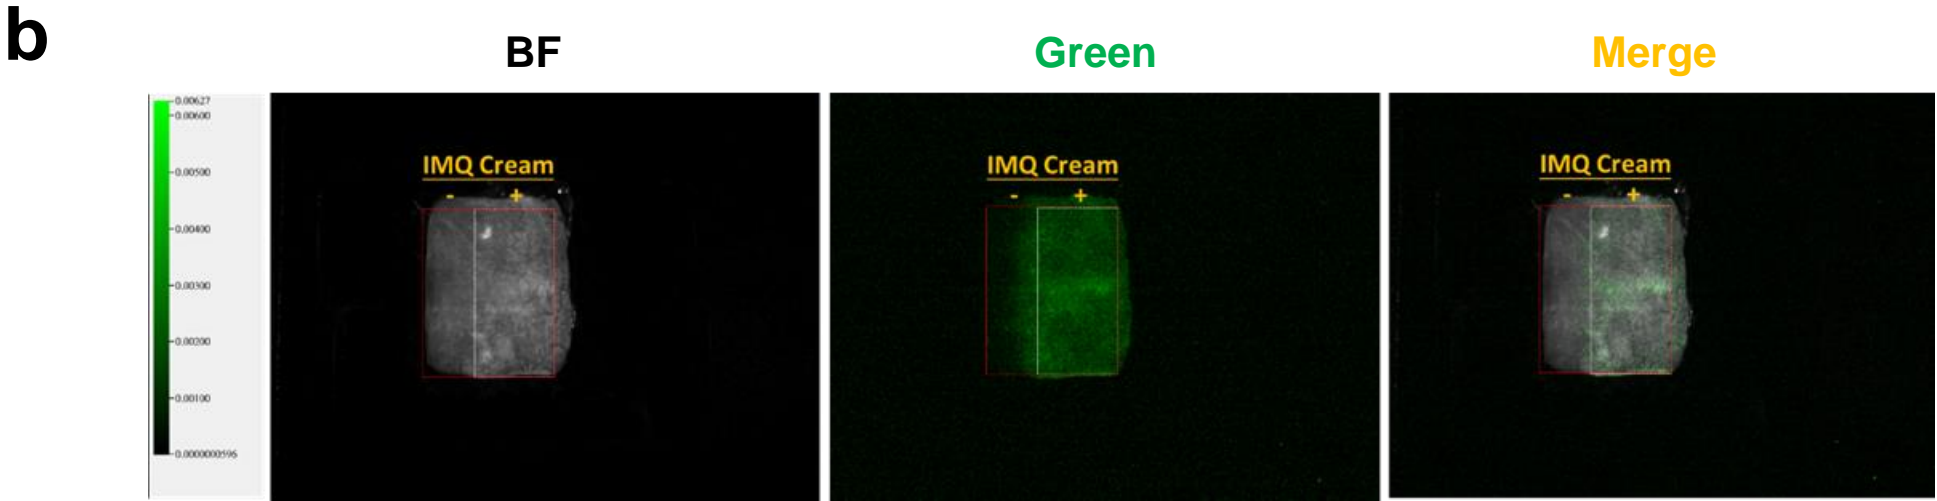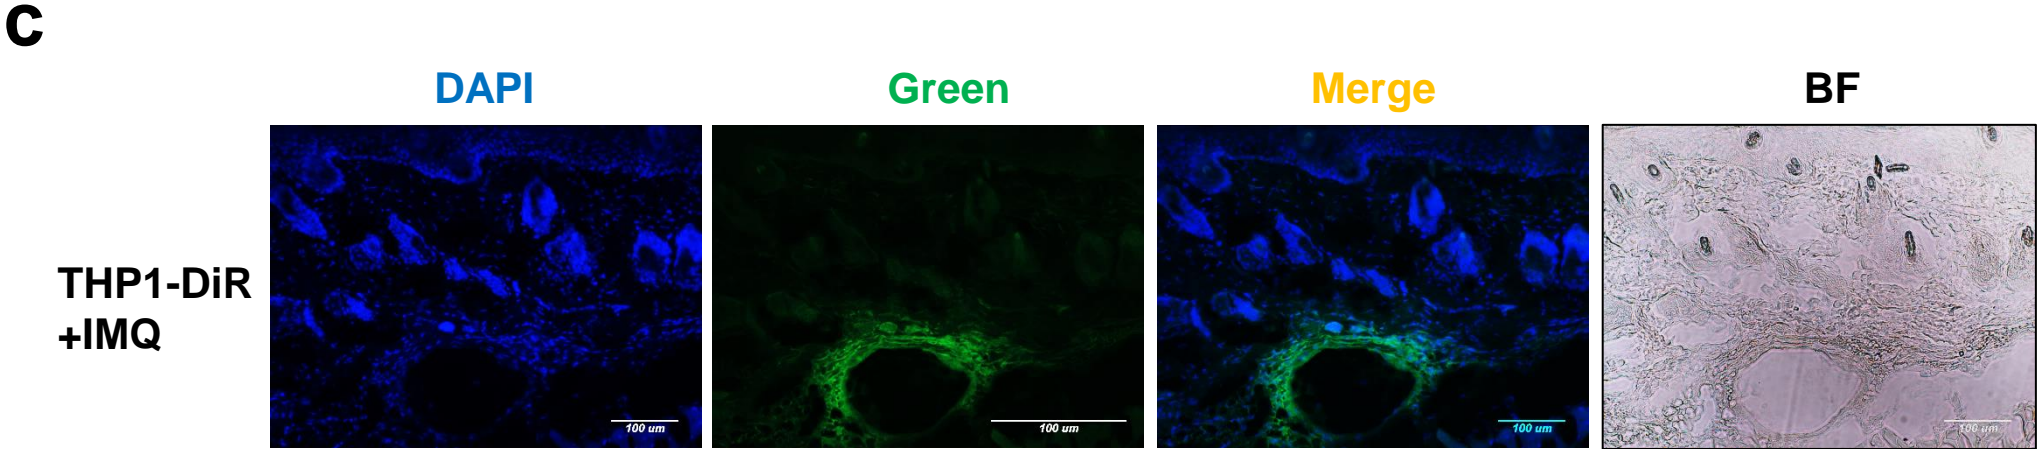

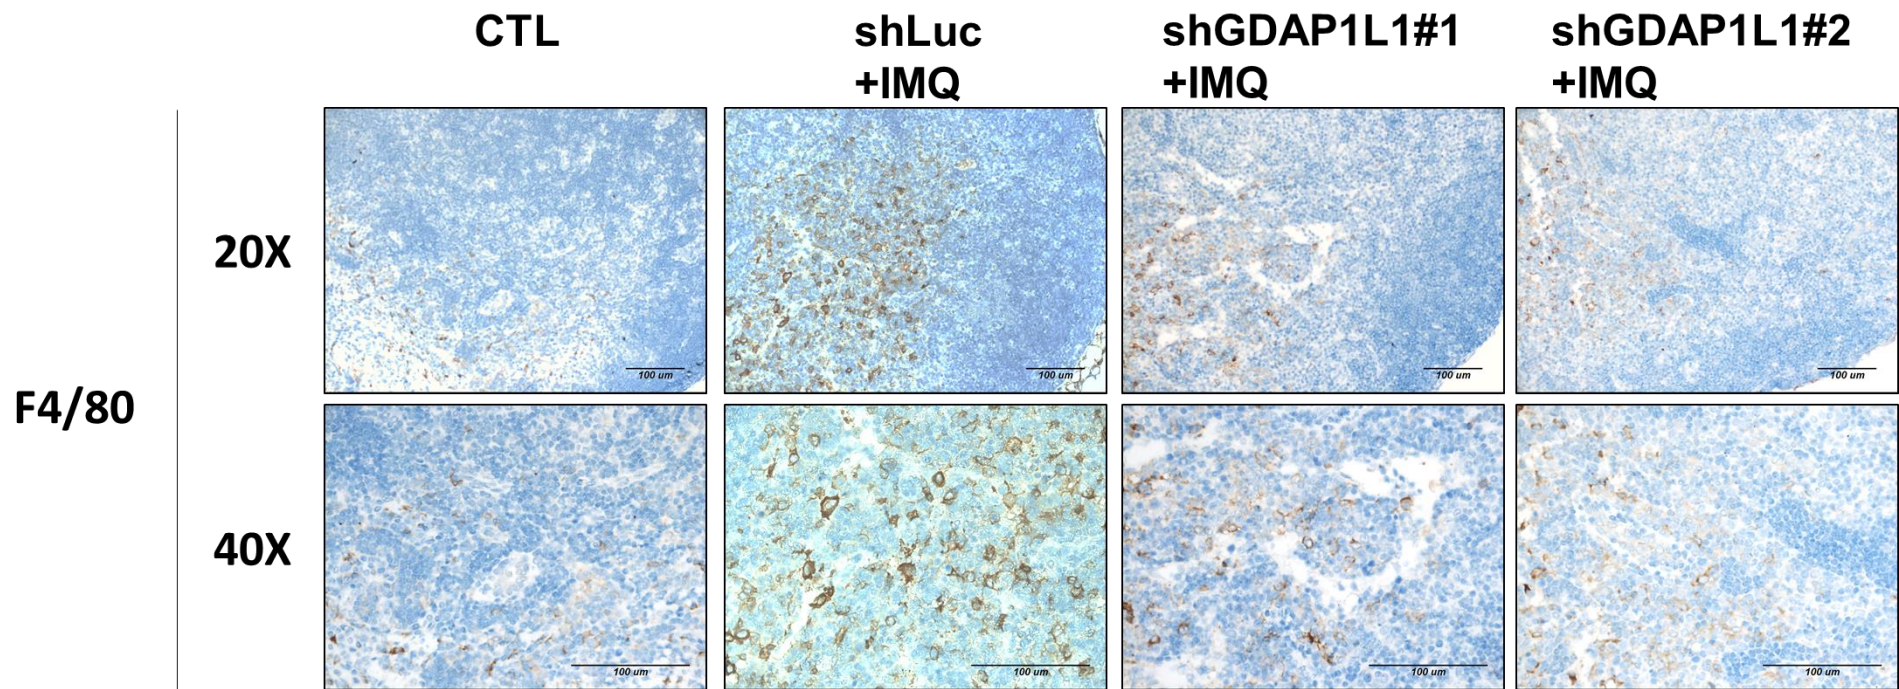

# Supplementary figure legends

- Suppl. Fig. 1. The quantification of protein band by densitometry. (a) The protein/GAPDH ratio of Fig. 2b, (b) the protein/GAPDH ratio of Fig. 2c, and (c) the protein/GAPDH ratio of Fig. 3a.
- Suppl. Fig. 2. The confirmation of the effect of clodronate liposomes on macrophage depletion. (a) the skin surface image, and (b) the count of macrophages in blood.
- Suppl. Fig. 3. The distribution of injected DiR-labeled THP1 cells in skin. (a) THP1 distribution in normal and IMQ-treated mouse skin, (b) THP1 distribution in the IMQ-treated skin and the untreated skin nearby IMQ-treated region, and (c) THP1 distribution in IMQ-treated skin visualized under confocal microscopy with a vertical view.
- Suppl. Fig. 4. Macrophage accumulation in lymph node of IMQ-treated mice transplanting shRNA-treated THP1.
